# Supplementary material
Source: PubMed Central journal article supplement (PMC7836269)
Supplement: mmc1.pdf [file mmc1.pdf]

# THE LANCET Infectious Diseases

## Supplementary webappendix

This webappendix formed part of the original submission and has been peer reviewed. We post it as supplied by the authors.

Supplement to: Kucharski AJ, Klepac P, Conlan AJK, et al, on behalf of the CMMID COVID-19 working group. Effectiveness of isolation, testing, contact tracing, and physical distancing on reducing transmission of SARS-CoV-2 in different settings: a mathematical modelling study. *Lancet Infect Dis* 2019; published online June 16. [https://doi.org/10.1016/S1473-3099\(20\)30457-6](https://doi.org/10.1016/S1473-3099(20)30457-6).

## **Appendix: Effectiveness of isolation, testing, contact tracing and physical distancing on reducing transmission of SARS-CoV-2 in different settings: a mathematical modelling study**

Adam J. Kucharski PhD<sup>1</sup>, Petra Klepac PhD<sup>1,2</sup>, Andrew J. K. Conlan PhD<sup>3</sup>, Stephen M. Kissler PhD<sup>4</sup>, Maria L. Tang MMath<sup>2</sup>, Hannah Fry PhD<sup>5</sup>, Julia R. Gog PhD<sup>2</sup>, W. John Edmunds PhD<sup>1</sup>, CMMID COVID-19 working group\*

<sup>1</sup>Centre for Mathematical Modelling of Infectious Diseases, London School of Hygiene & Tropical Medicine

<sup>2</sup>Department of Applied Mathematics and Theoretical Physics, University of Cambridge

<sup>3</sup>Department of Veterinary Medicine, University of Cambridge

<sup>4</sup>Department of Immunology and Infectious Diseases, Harvard T.H. Chan School of Public Health

<sup>5</sup>Centre for Advanced Spatial Analysis, University College London

\* List of members given at end of Appendix

### **Model description**

In each simulation, for each of the four contact settings, the number of baseline secondary infections per primary case under no control measures were drawn from a binomial distribution

$R_{base} = B(N_c, p_{inf})$ , where  $N_c = (\text{number of daily contacts}) \times (\text{days infectious})$  and

$p_{inf} = SAR \times (\text{relative infectiousness})$ , where relative infectiousness = 1 if an individual is

(pre-)symptomatic and 50% if asymptomatic. We then generated secondary infections accounting for reduction in  $R_{isol} = B(R_{base}, 1 - p_{isol})$ , where  $p_{isol}$  is the proportion of the infectious period spent in isolation. In the household setting, we assume  $N_c = (\text{number of daily contacts})$  because the household contacts will be repeated each day. The number of infected contacts successfully traced were in turn drawn from a binomial distribution  $R_{traced} = B(R_{isol}, p_{trace})$ , where

$p_{trace} = P(\text{successfully traced}) \times P(\text{individual adheres fully to quarantine})$ . For each contact, we

generated a time of infection uniformly from the period during which the index case was infectious and not isolated. We assumed manually traced contacts were quarantined within two days of index case being isolated, and app-based contacts immediately. If contacts were quarantined after becoming infectious (i.e. more than 4 days after infection), then we scaled their contribution to  $R_{traced}$  based on the proportion of their infectious period they spent out of quarantine. For example, if a contact spent 3/5 days of their infectious period within quarantine, then only 60% of onwards transmission was averted. The overall reduction in transmission resulting from control measures was therefore equal to  $R_{control} = R_{base} - R_{traced}$ . The overall effective reproduction number  $R_{eff}$  under different control scenarios was equal to the mean of  $R_{control}$  across all simulations. Full model code is available from: <https://github.com/adamkucharski/2020-cov-tracing>

### **Phone ownership data**

85% of individuals aged 16 years or older in the UK are smartphone users;<sup>1</sup> 16% of the UK population are younger than 10 years or older than 80 years,<sup>2</sup> so we assumed that 71% of the population uses smartphones.

### **Testing data**

As of mid-April 2020, the largest per-capita SARS-CoV-2 daily testing effort in the world was in Iceland (7 tests per 1000 people).<sup>3</sup> In our optimistic scenario, we therefore assumed a weekly testing probability of 5% (i.e. 0.7% x 7).

### **References**

<sup>1</sup>Ofcom Nations & Regions Technology Tracker, 2019. Available from:

[https://www.ofcom.org.uk/\\_data/assets/pdf\\_file/0026/143981/technology-tracker-2019-uk-data-tables.pdf](https://www.ofcom.org.uk/_data/assets/pdf_file/0026/143981/technology-tracker-2019-uk-data-tables.pdf)

<sup>2</sup>Office for National Statistics. 2011 UK census. Colchester: UK Data Service, 2011.

<sup>3</sup>Hasell J, Ortiz-Ospina E, Mathieu E, Ritchie H, Beltekian D, Roser M. To understand the global pandemic, we need global testing – the Our World in Data COVID-19 Testing dataset. Our World Data, 2020. Available from: <https://ourworldindata.org/covid-testing>

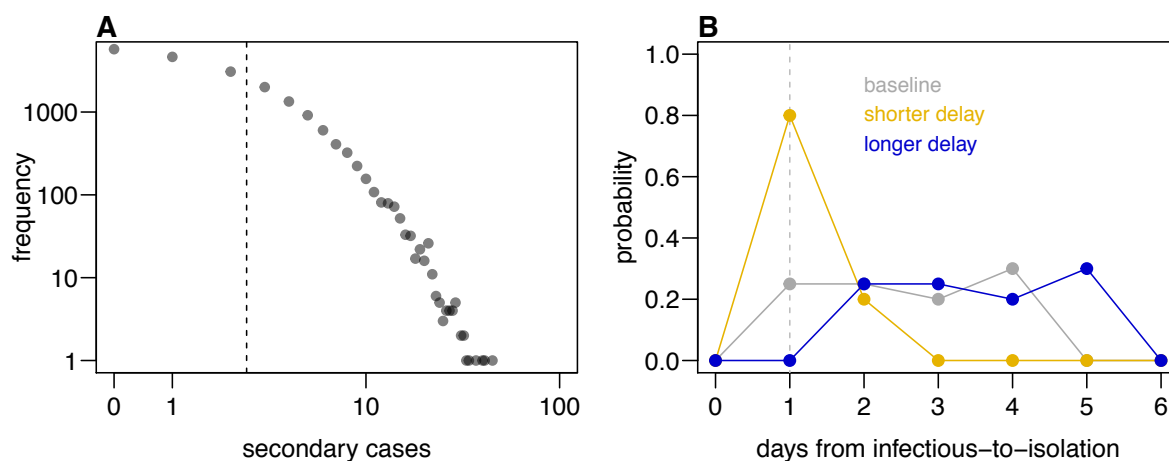

**Figure S1: Model assumptions about transmission and infectiousness.** A) Individual-level distribution of secondary transmission in baseline scenario. Dashed line shows mean (i.e.  $R_{eff}$ ). B) Distribution scenarios for delay from infectious-to-isolation. We assume the pre-symptomatic period lasts one day; dashed line shows time of onset of symptoms in these scenarios.

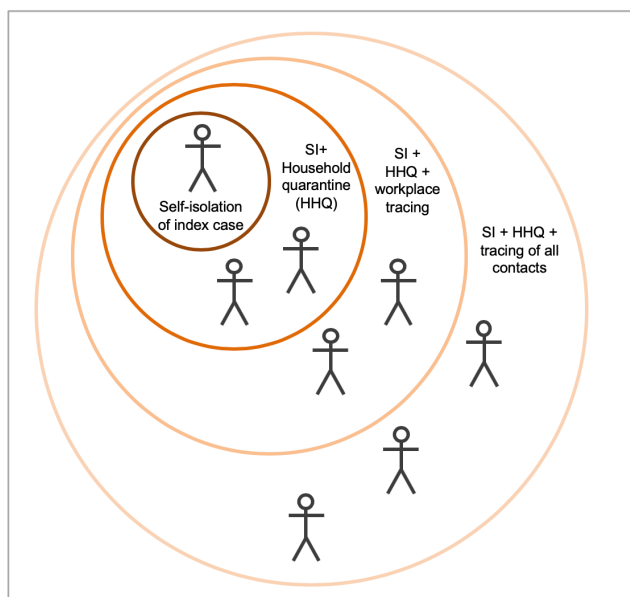

**Figure S2: Schematic of different contact tracing assumptions.** Upon onset of symptoms, the index case may isolate; the household may then be quarantined and contacts may then be traced at school/work or also in other settings (i.e. tracing of all contacts).

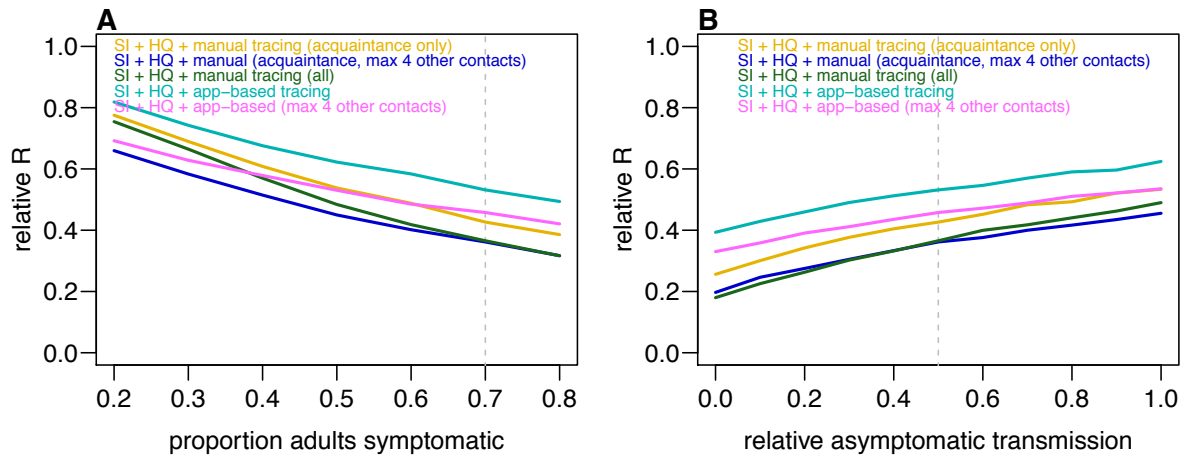

**Figure S3: Impact of proportion of the adult population who are symptomatic and relative transmission from asymptomatic individuals on reduction in transmission.** A) Relative reduction in the reproduction number (i.e. ratio between baseline  $R$  and  $R$  under control measures) when different proportions of the adult population are symptomatic. We assume that the proportion of children that are symptomatic is scaled according to our baseline assumption, i.e. the proportion is equal to 30/70 multiplied by the adult proportion. B) Relative transmission reduction when asymptomatic individuals have different relative transmission risks compared to symptomatic individuals. Dashed lines show baseline assumption.

| Scenario                                                                                      | Baseline assumptions |            | HH SAR=20%,<br>other contact<br>SAR=7% |            | HH SAR=40%, other contact<br>SAR=5% |            |
|-----------------------------------------------------------------------------------------------|----------------------|------------|----------------------------------------|------------|-------------------------------------|------------|
|                                                                                               | Reduction            | Quar.      | Reduction                              | Quar.      | Reduction                           | Quar.      |
| Self-isolation within home (SI)                                                               | 29%                  | 0 (0-0)    | 30%                                    | 0 (0-0)    | 24%                                 | 0 (0-0)    |
| Self-isolation outside home                                                                   | 35%                  | 0 (0-0)    | 34%                                    | 0 (0-0)    | 33%                                 | 0 (0-0)    |
| SI & HH quarantine (HHQ)                                                                      | 37%                  | 2 (0-4)    | 37%                                    | 2 (0-4)    | 41%                                 | 2 (0-4)    |
| SI + HHQ + work/school contact tracing (CT)                                                   | 53%                  | 13 (1-110) | 53%                                    | 13 (1-110) | 55%                                 | 13 (1-110) |
| SI + HHQ + manual CT of acquaintances                                                         | 57%                  | 22 (1-120) | 58%                                    | 22 (1-120) | 57%                                 | 21 (1-120) |
| SI + HHQ + manual contact tracing of all contacts                                             | 64%                  | 29 (1-140) | 64%                                    | 29 (1-140) | 62%                                 | 29 (1-140) |
| SI + HHQ + app-based tracing                                                                  | 47%                  | 4 (1-69)   | 47%                                    | 4 (1-71)   | 49%                                 | 4 (1-70)   |
| SI + HHQ + manual CT of acquaintances + app-based tracing                                     | 61%                  | 25 (1-130) | 61%                                    | 25 (1-130) | 60%                                 | 25 (1-130) |
| SI + HHQ + manual CT of acquaintances + limit to 4 daily 'other' contacts                     | 64%                  | 17 (1-110) | 64%                                    | 17 (1-100) | 63%                                 | 17 (1-100) |
| SI + HHQ + manual CT of acquaintances + app-based tracing + limit to 4 daily 'other' contacts | 66%                  | 21 (1-110) | 67%                                    | 21 (1-110) | 64%                                 | 21 (1-110) |

**Table S1: Reduction in transmission and number of contacts quarantined per symptomatic case under different assumptions about secondary attack rate (SAR) among contacts made within and outside households.** Median and 90% prediction interval shown for contacts quarantined. HH SAR=20% and other contact SAR=7% corresponded to baseline  $R_{eff}=2.9$ ; HH SAR=40% and other contact SAR=5% corresponded to baseline  $R_{eff}=2.7$ .

| Scenario                                                                                      | Baseline assumptions |            | Shorter delay to self-isolation |            | Longer delay to self-isolation |            |
|-----------------------------------------------------------------------------------------------|----------------------|------------|---------------------------------|------------|--------------------------------|------------|
|                                                                                               | Reduction            | Quar.      | Reduction                       | Quar.      | Reduction                      | Quar.      |
| Self-isolation within home (SI)                                                               | 29%                  | 0 (0-0)    | 47%                             | 0 (0-0)    | 18%                            | 0 (0-0)    |
| Self-isolation outside home                                                                   | 35%                  | 0 (0-0)    | 53%                             | 0 (0-0)    | 20%                            | 0 (0-0)    |
| SI & HHQ quarantine (HHQ)                                                                     | 37%                  | 2 (0-4)    | 54%                             | 2 (0-4)    | 25%                            | 2 (0-4)    |
| SI + HHQ + work/school contact tracing (CT)                                                   | 53%                  | 13 (1-110) | 62%                             | 13 (1-110) | 47%                            | 13 (1-110) |
| SI + HHQ + manual CT of acquaintances                                                         | 57%                  | 22 (1-120) | 63%                             | 21 (1-120) | 51%                            | 21 (1-110) |
| SI + HHQ + manual contact tracing of all contacts                                             | 64%                  | 29 (1-140) | 67%                             | 29 (1-140) | 59%                            | 29 (1-140) |
| SI + HHQ + app-based tracing                                                                  | 47%                  | 4 (1-69)   | 58%                             | 4 (1-69)   | 38%                            | 4 (1-70)   |
| SI + HHQ + manual CT of acquaintances + app-based tracing                                     | 61%                  | 25 (1-130) | 65%                             | 25 (1-130) | 56%                            | 25 (1-130) |
| SI + HHQ + manual CT of acquaintances + limit to 4 daily 'other' contacts                     | 64%                  | 17 (1-110) | 69%                             | 17 (1-100) | 60%                            | 17 (1-110) |
| SI + HHQ + manual CT of acquaintances + app-based tracing + limit to 4 daily 'other' contacts | 66%                  | 21 (1-110) | 70%                             | 21 (1-110) | 63%                            | 21 (1-110) |

**Table S2: Reduction in transmission and number of contacts quarantined per symptomatic case under different assumptions about pre-symptomatic period and delay to self-isolation.**

Assumptions about the distributions of delays shown in Figure S1. Median and 90% prediction interval shown for contacts quarantined.

**CMMID working group members (order selected at random)**

Jon C Emery, Graham Medley, James D Munday, Timothy W Russell, Quentin J Leclerc, Charlie Diamond, Simon R Procter, Amy Gimma, Fiona Yueqian Sun, Hamish P Gibbs, Alicia Rosello, Kevin van Zandvoort, Stéphane Hué, Sophie R Meakin, Arminster K Deol, Gwen Knight, Thibaut Jombart, Anna M Foss, Nikos I Bosse, Katherine E. Atkins, Billy J Quilty, Rachel Lowe, Kiesha Prem, Stefan Flasche, Carl A B Pearson, Rein M G J Houben, Emily S Nightingale, Akira Endo, Damien C Tully, Yang Liu, Julian Villabona-Arenas, Kathleen O'Reilly, Sebastian Funk, Rosalind M Eggo, Mark Jit, Eleanor M Rees, Joel Hellewell, Samuel Clifford, Christopher I Jarvis, Sam Abbott, Megan Auzenbergs, Nicholas G. Davies, David Simons

**CMMID working group member funding acknowledgements**

The following funding sources are acknowledged as providing funding for the working group authors. Alan Turing Institute (AE). BBSRC LIDP (BB/M009513/1: DS). This research was partly funded by the Bill & Melinda Gates Foundation (INV-001754: MQ; INV-003174: KP, MJ, YL; NTD Modelling Consortium OPP1184344: CABP, GM; OPP1180644: SRP; OPP1183986: ESN; OPP1191821: KO'R, MA). DFID/Wellcome Trust (Epidemic Preparedness Coronavirus research programme 221303/Z/20/Z: CABP, KvZ). Elrha R2HC/UK DFID/Wellcome Trust/This research was partly funded by the National Institute for Health Research (NIHR) using UK aid from the UK Government to support global health research. The views expressed in this publication are those of the author(s) and not necessarily those of the NIHR or the UK Department of Health and Social Care (KvZ). ERC Starting Grant (#757688: CJVA, KEA; #757699: JCE, RMGJH; 757699: MQ). This project has received funding from the European Union's Horizon 2020 research and innovation programme - project EpiPose (101003688: KP, MJ, WJE, YL). This research was partly funded by the Global Challenges Research Fund (GCRF) project 'RECAP' managed through RCUK and ESRC (ES/P010873/1: AG, CIJ, TJ). HDR UK (MR/S003975/1: RME). Nakajima Foundation (AE). NIHR (16/137/109: BJQ, CD, FYS, MJ, YL; Health Protection Research Unit for Modelling Methodology HPRU-2012-10096: NGD, TJ; PR-OD-1017-20002: AR). Royal Society (Dorothy Hodgkin Fellowship: RL). UK DHSC/UK Aid/NIHR (ITCRZ 03010: HPG). UK MRC (LID DTP MR/N013638/1: EMR, GRGL, QJL; MC\_PC 19065: RME; MR/P014658/1: GMK). Authors of this research receive funding from UK Public Health Rapid Support Team funded by the United Kingdom Department of Health and Social Care (TJ). Wellcome Trust (206250/Z/17/Z: TWR; 206471/Z/17/Z: OJB; 208812/Z/17/Z: SC, SFlasche; 210758/Z/18/Z: JDM, JH, NIB, SA, SFunk, SRM). No funding (AKD, AMF, DCT, SH).
